# Supplementary material
Source: MDPI journal article supplement (https://www.mdpi.com/2077-1312/9/5/450)

# Supplemental Figure 1

Maximum photochemical quantum yield ( $F_v/F_m$ ) of Photosystem II (PSII) of culture grown during low light ( $35 \mu\text{mol photons m}^{-1} \text{s}^{-1}$ ) and after an upward light shift ( $250 \mu\text{mol photons m}^{-1} \text{s}^{-1}$ ). Points show averages of the  $F_v/F_m$  of three independently grown cultures, and error bars show the standard deviations ( $n = 3$ ).

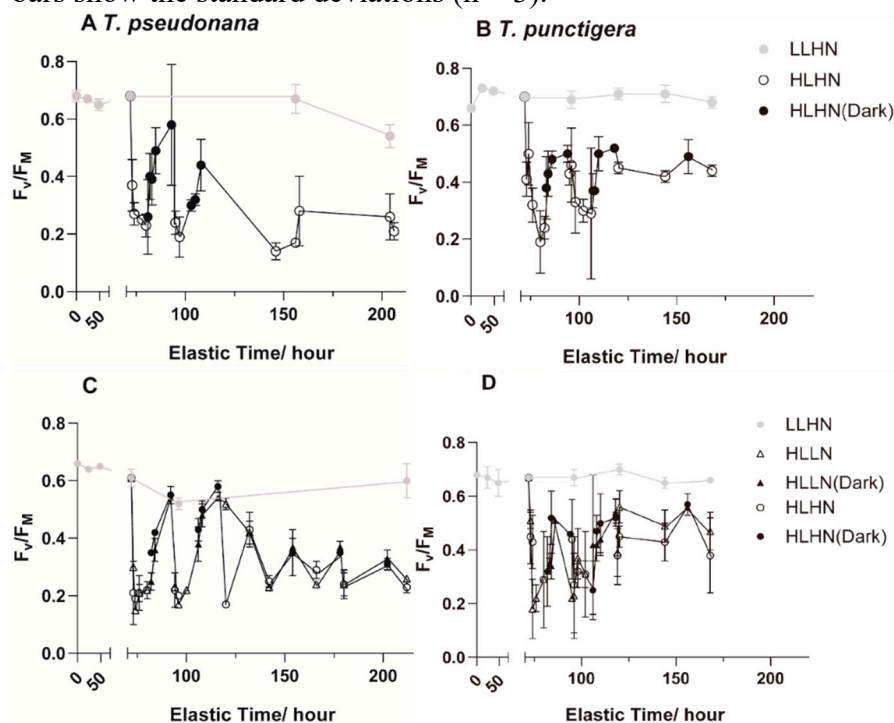

Supplement: s1 [file s1]
